# Supplementary material for: Genome-wide identification of the AP2/ERF gene family in Rosa persica and expression profiling under abiotic stresses
Source: Research Square preprint supplement (doi:10.21203/rs.3.rs-7203695/v1), 2025-08-28
Supplement: Supplementary file 1 [file 216516cd8afe6ba7fe41576b.xlsx]

## Sheet: Table S1
Table S1 Physicochemical characterization of Rosa persica AP2/ERF protein
ID	Number of Amino Acid	Molecular Weight	Theoretical pI	Instability Index	Aliphatic Index	Grand Average of Hydropathicity	Subcellular Localization Prediction
A000782.1	401	45015.4	5.2	64.73	57.66	-0.876	Nucleus
A001337.1	268	29173.7	5.15	54.37	51.53	-0.807	Nucleus
A001394.1	273	29626.7	4.84	53.28	67.51	-0.524	Nucleus
A001398.1	214	23910.7	6.25	70.66	67.06	-0.733	Nucleus
A001400.1	553	60137.7	6.24	51.58	53.31	-0.769	Nucleus
A001402.1	222	24724.3	7.07	60.26	51.62	-0.805	Nucleus
A001403.1	234	26334.3	5.64	67.06	59.7	-0.705	Nucleus
A001957.1	302	34397.2	5.06	59.54	71.59	-0.75	Nucleus
A002053.1	190	21121.4	6.11	52.98	53	-0.807	Nucleus
A002059.1	338	37749.3	5.38	58.91	68.34	-0.66	Nucleus
A002320.1	458	49851.7	8.92	53.41	66.7	-0.545	Nucleus
A002715.1	326	35757.1	5.87	57.46	46.99	-0.826	Nucleus
A002755.1	385	42384.2	4.88	38.26	50.42	-0.832	Nucleus
A002909.1	286	32048.5	5.57	48.27	68.88	-0.724	Nucleus
A002910.1	293	31978.8	6.61	62.82	72.7	-0.462	Nucleus
A002912.1	213	23992.2	4.88	78.31	49.11	-1.046	Nucleus
A003078.1	231	25206.1	5.42	53.79	57.58	-0.52	Nucleus
A003260.1	363	40782.5	4.95	65.02	59.64	-0.672	Nucleus
A003848.1	205	22832.7	9.35	64.55	70	-0.661	Nucleus
A004056.1	258	28107.8	5.01	62.47	51.12	-0.729	Nucleus
A004368.1	209	23028.3	4.95	58.34	53.73	-0.683	Nucleus
A005039.1	227	24941.7	5.16	48.87	61.94	-0.695	Nucleus
A005041.1	191	20672.4	8.59	51.74	65.92	-0.562	Nucleus
A005044.1	196	21151.9	8.25	49.01	55.71	-0.714	Nucleus
A005047.1	225	24461.5	8.83	42.25	67.24	-0.648	Nucleus
A005097.1	169	18376.7	7.63	45.19	53.31	-0.718	Nucleus
A005302.1	659	73565.4	6.51	51.21	54.63	-0.795	Nucleus
A005427.1	485	54033.3	5.71	46.65	54.06	-0.691	Nucleus
A005638.1	340	38025.5	6.32	67.9	64.62	-0.665	Nucleus
A005829.1	391	41815.2	8.8	63.45	59.18	-0.551	Nucleus
A006188.1	376	41890.2	5.55	62.81	52.47	-0.839	Nucleus
A006323.1	145	16385.6	10.45	37.7	53.38	-0.925	Nucleus
A006459.1	467	51700.6	9.04	56.06	58.35	-0.846	Nucleus
A006543.1	200	22761.6	5.81	59.6	69.25	-0.63	Nucleus
A006558.1	302	32949.9	10.03	42.05	69.4	-0.488	Chloroplast
A006690.1	193	21594.2	7.03	66.33	72.33	-0.749	Nucleus
A006922.1	262	28501.4	5.22	61.5	70.42	-0.624	Nucleus
A007190.1	577	63796	5.67	55.96	54.45	-0.785	Nucleus
A007303.1	361	40200.3	4.96	41.8	54.65	-0.848	Nucleus
A008045.1	182	20133.7	9.71	54.23	50.99	-0.677	Nucleus
A008193.1	303	34924.2	6.52	46.41	68.51	-0.684	Cytoplasm
A008425.1	419	46343.1	4.62	63.25	61.84	-0.669	Nucleus
A008533.1	506	56173.9	9.33	51.28	62.57	-0.625	Nucleus
A008998.1	835	90980.6	6.03	46.76	53.51	-0.796	Nucleus
A009100.1	165	17985	8.84	46.51	46.24	-0.807	Nucleus
A009162.1	234	26304	4.61	53.1	65.85	-0.571	Nucleus
A009183.1	294	32430.7	6.96	43	58.5	-0.737	Nucleus
A009919.1	597	68316	4.55	36.51	64.91	-0.841	Nucleus
A010347.1	457	50847.8	6.6	59.89	58.6	-0.563	Nucleus
A010638.1	189	20042.1	5.64	49.24	65.24	-0.439	Nucleus
A010645.1	200	22212.2	5.56	58.84	73.2	-0.442	Nucleus
A011210.1	287	32425.3	5.47	49.5	57.14	-0.792	Nucleus
A011282.1	426	46883.5	9.1	48.66	60.14	-0.766	Mitochondria
A012416.1	156	17373.1	5.97	61.25	50.77	-0.879	Nucleus
A012417.1	235	26211.9	5.19	49.98	59.02	-0.694	Nucleus
A013003.1	305	33104.4	6.31	59.29	49.31	-0.696	Nucleus
A013004.1	551	59865.5	7.13	43.53	56.01	-0.624	Nucleus
A013214.1	365	41069.5	6.8	46.73	56.25	-0.787	Nucleus
A013309.1	328	36652.7	5.51	48.89	66.65	-0.787	Nucleus
A013714.1	403	44682	8.34	51.28	64.19	-0.649	Nucleus
A014047.1	340	37889.7	5.24	59.63	55.12	-0.637	Nucleus
A014162.1	267	29850.7	6.02	49.5	76.4	-0.66	Nucleus
A014479.1	269	29454	6.06	74.33	33.42	-0.91	Nucleus
A014504.1	239	26930.3	5.83	65.69	46.57	-1.128	Nucleus
A014786.1	426	47146.6	6.56	54.88	41.74	-0.746	Nucleus
A014948.1	348	38636.8	4.75	57.65	60.23	-0.735	Nucleus
A014990.1	369	40890.9	9.15	48.35	66.59	-0.679	Nucleus
A015325.1	836	93417.7	6.43	45.44	69.88	-0.56	Nucleus
A016424.1	162	17542.8	9.81	46.88	75.86	-0.406	Mitochondria
A016426.1	265	28469.4	9.39	50.97	59.7	-0.639	Nucleus
A016485.1	176	19586.1	9.26	52.43	69.94	-0.573	Nucleus
A016486.1	268	29983.4	4.82	51.88	65.93	-0.596	Cytoplasm
A017825.1	251	26629.8	10.02	43.93	55.9	-0.705	Nucleus
A019547.1	486	53102	6.68	53.95	58.23	-0.585	Nucleus
A020250.1	266	30095.4	5.53	57.38	65.64	-0.697	Nucleus
A020463.1	494	53909.1	5.53	49.85	63.81	-0.582	Nucleus
A020561.1	351	39910.8	5.86	40.42	71.31	-0.609	Cytoplasm
A020660.1	285	31652.1	6.51	50.04	64.77	-0.661	Nucleus
A021322.1	268	30054.3	5.37	59.11	48.17	-0.934	Nucleus
A023124.1	147	16865	7.91	42.55	61.77	-0.751	Chloroplast
A023125.1	150	16466.1	6.75	61.03	56.73	-0.724	Nucleus
A023126.1	138	15727.4	9.39	73.65	57.39	-0.856	Nucleus
A023127.1	145	16487.2	6.15	45.07	61.38	-0.8	Nucleus
A023128.1	150	17007.7	6.76	53.34	52.13	-0.938	Nucleus
A023131.1	262	29611.2	5.34	56.18	69.24	-0.506	Nucleus
A023588.1	290	32270.4	5.68	43.07	51.52	-0.897	Nucleus
A023874.1	201	22873.6	6.6	55.33	65.07	-0.921	Nucleus
A024016.1	206	23423.6	8.37	60.4	70.58	-0.773	Nucleus
A024194.1	264	28546	5.68	44.56	58.03	-0.486	Nucleus
A024528.1	249	27077.1	5.35	63.03	65.46	-0.592	Nucleus
A024668.1	213	24062.2	9.86	47.97	64.13	-0.708	Nucleus
A024791.1	650	71432.8	6.49	51.13	57.29	-0.694	Nucleus
A025595.1	214	23585.3	9.21	56.66	65.7	-0.596	Nucleus
A025658.1	400	45050.5	5.2	59.18	73.83	-0.523	Nucleus
A025886.1	263	29052	7.14	61.56	63.84	-0.711	Nucleus
A025887.1	490	53534	6.03	52.97	78.65	-0.381	Nucleus
A026361.1	334	37288.1	5.04	53.18	58.11	-0.627	Nucleus
A026368.1	489	53408.8	9.72	42.26	72.23	-0.668	Nucleus
A026647.1	284	30497.2	4.95	61.45	66.06	-0.499	Nucleus
A026648.1	252	28689.8	5.56	67.31	59.29	-0.956	Nucleus
A026649.1	386	43790.1	6.4	74.99	67.49	-0.734	Nucleus
A026650.1	243	27369.2	5.77	56.9	59.05	-0.861	Nucleus
A026889.1	223	24689	4.98	53.66	54.84	-0.861	Nucleus
A026890.1	182	20288.6	6.44	49.73	62.36	-0.716	Nucleus
A026930.1	338	37698.5	8.5	55.4	67.81	-0.579	Nucleus
A026931.1	299	31495.1	6.35	53.38	69.2	-0.353	Nucleus
A026936.1	312	35245.6	6.83	56.76	69.68	-0.431	Nucleus
A028426.1	166	17604.3	5.5	55.01	58.31	-0.578	Nucleus
A028429.1	166	17607.6	8.38	55.21	65.96	-0.483	Nucleus
A028433.1	196	21622.1	5.25	58.44	59.34	-0.587	Nucleus
A028435.1	197	21943.6	4.85	73.28	63.45	-0.598	Nucleus
A028438.1	194	21592.4	5.27	72.24	61.44	-0.571	Nucleus
A028597.1	184	20102.8	5.87	37.02	68.42	-0.345	Chloroplast
A028912.1	373	40550.9	6.4	69.16	53.97	-0.688	Nucleus
